# Supplementary material for: Use of pembrolizumab with or without pomalidomide in HIV-associated non-Hodgkin’s lymphoma
Source: PubMed Central journal article supplement — J Immunother Cancer. 2021 Feb 19;9(2):e002097. doi: 10.1136/jitc-2020-002097 (PMC7898875; doi:10.1136/jitc-2020-002097), 2021-02-19
Supplement: jitc-2020-002097supp001.pdf [file jitc-2020-002097supp001.pdf]

**Supplementary Table 1. Lymphoma Therapies Received Prior to Pembrolizumab +/- Pomalidomide**

| Patient | Prior Therapies (number of cycles)                               |
|---------|------------------------------------------------------------------|
| 1       | EPOCH (4), EPOCH-R <sup>2</sup> (2)                              |
| 2       | R-EPOCH (6), R-ICE (3), ASCT, XRT to bone lesions                |
| 3       | EPOCH (6), XRT to nodal disease, gem/ox (6), gem/ox (4), ICE (3) |
| 4       | R-EPOCH (3)                                                      |
| 5       | R-CHOP (1), R-EPOCH (2), R-ICE (1)                               |
| 6       | EPOCH-R <sup>2</sup> (6), TEDD (5)                               |
| 7       | EPOCH-R <sup>2</sup> (5), ICE (1)                                |
| 8       | R-CHOP (6), R-ICE (3), Lenalidomide (2), R-ESHAP (2)             |
| 9       | R-CHOP (1), R-EPOCH (5)                                          |
| 10      | R-CHOP (8), ICE (1)                                              |

ASCT indicates autologous stem cell transplant; CHOP, cyclophosphamide, doxorubicin, vincristine and prednisone; ESHAP, etoposide, methylprednisolone, high-dose cytarabine, and cisplatin; EPOCH, dose-adjusted infusional etoposide, vincristine and doxorubicin with cyclophosphamide and prednisone; gem/ox, gemcitabine and oxaliplatin; ICE, ifosfamide, carboplatin, and etoposide; R, rituximab; R<sup>2</sup>, rituximab and lenalidomide; TEDD, temozolomide, etoposide, liposomal doxorubicin, and dexamethasone; XRT, radiation.
